# Supplementary material for: Mechanism of the reduction and energy transfer between Eu2+ and Eu3+ in Eu-doped CaAl2Si2O8 materials prepared in air
Source: Royal Society of Chemistry journal article supplement (doi:10.1039/c3tc32378a), 2013-12-16

## Supporting Information

Figure.S1 Calcium environments and bond length in CASO (Wyck.:

4i)

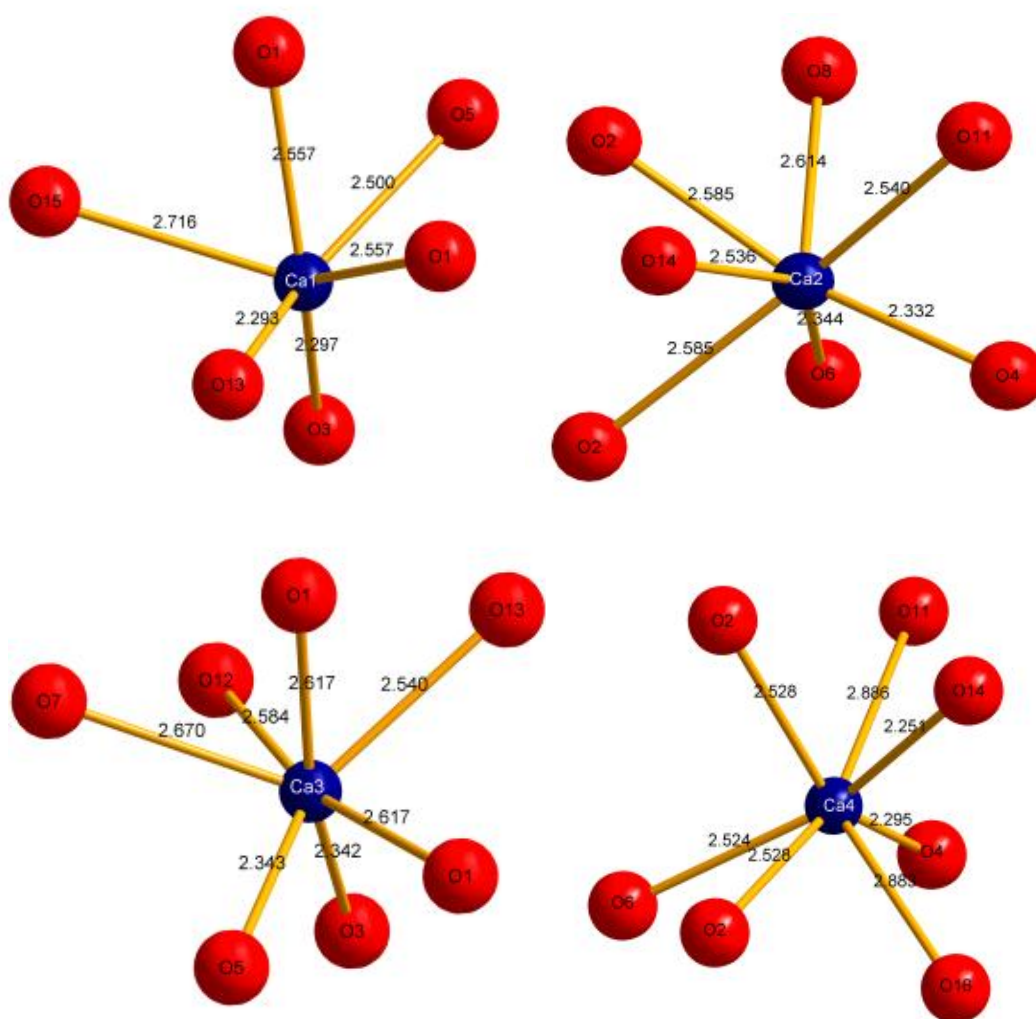

Figure.S2 Evolution of the cell parameters of  $\text{Ca}_{1-x}\text{Eu}_x\text{ASO}$  with  $x =$   
0 to 70%

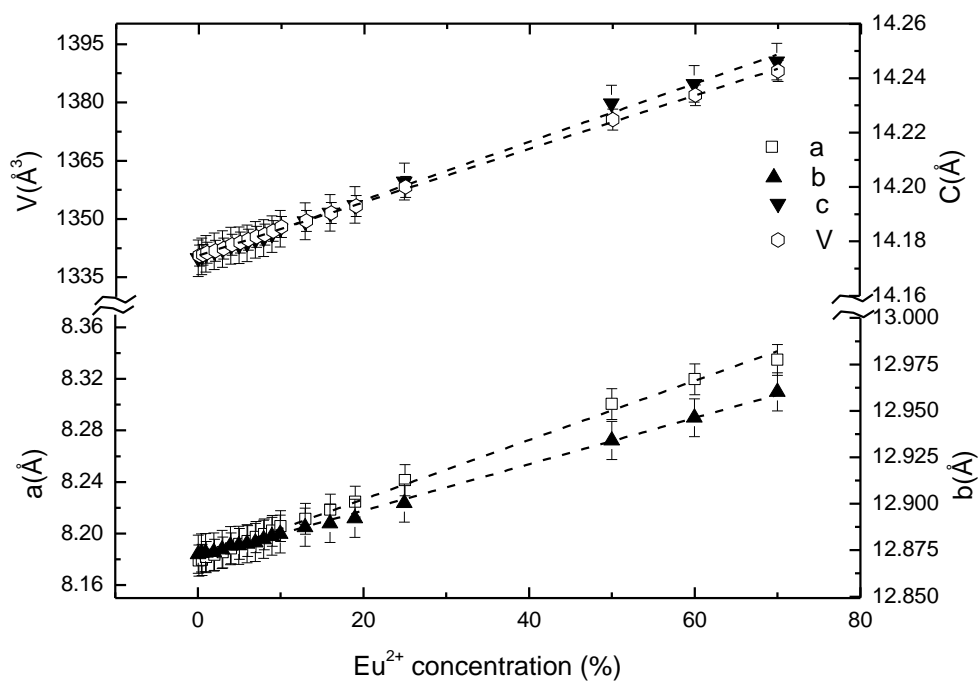

Figure.S3 Excitation spectra of the  $C_{1-x}Eu_xASO$  ( $x = 0.1\%$ ,  $4\%$  and  $7\%$ ) monitored at  $611\text{ nm}$ , inset is the enlarger spectra between the wavelength  $390$  and  $480\text{ nm}$

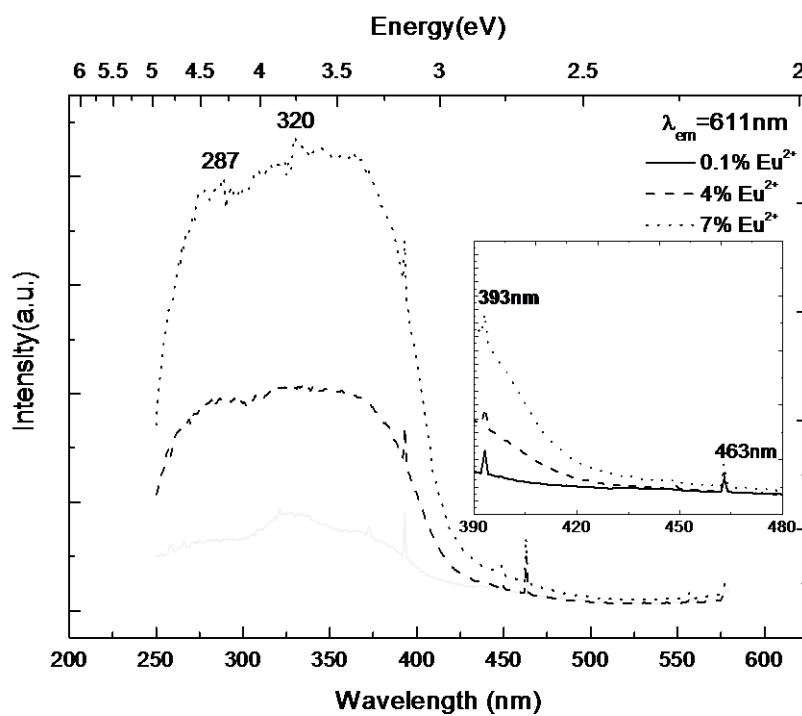

Figure.S4 The PLE and PL spectra of  $\text{Eu}^{2+}$  in  $\text{C}_{1-3x/2}\text{ASO}: x\text{Eu}$   
synthesized in air ( $x = 0.5\%$  to  $13\%$ )

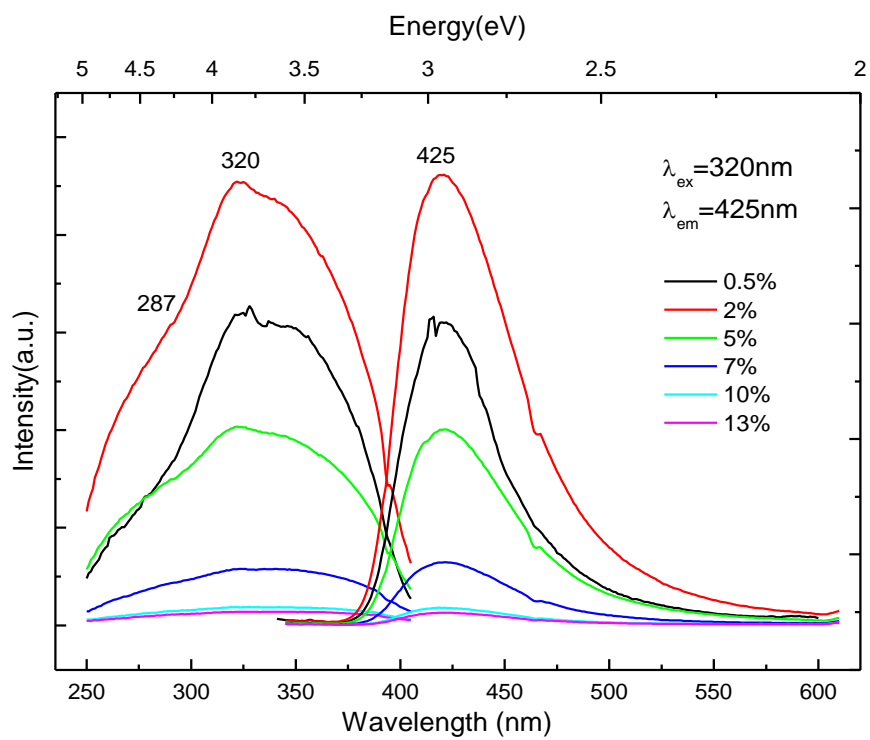

Figure.S5 A schematic diagram of the induced luminescence from CASO resulting from radiative ET from  $\text{Eu}^{2+}$  to  $\text{Eu}^{3+}$

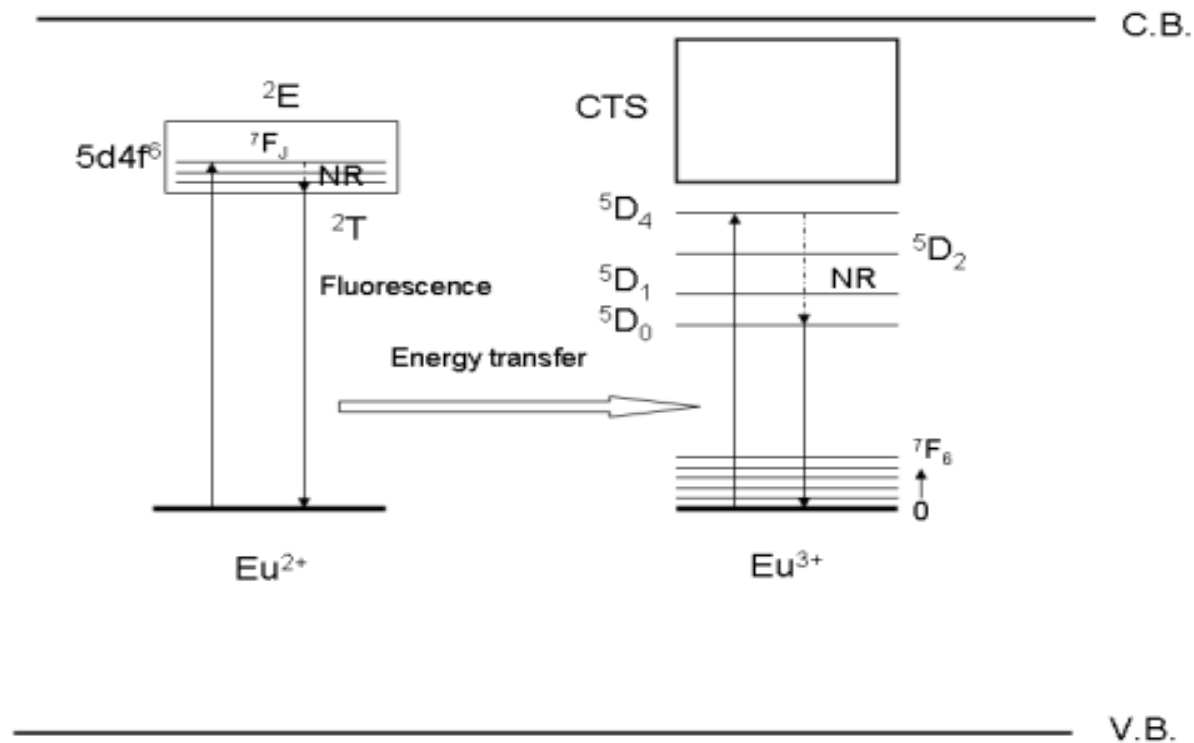

Figure.S6 Excitation spectra  $C_{1-3x/2}ASO:xEu^{3+}$  ( $x = 5\%$ ) of the A ( $Eu^{3+}$ ) emission (monitored at  $\lambda_{em} = 611$  nm, solid line), which include the S ( $Eu^{2+}$ ) absorption (located at  $\sim 320$  nm) and A absorption bands. The dotted line (excitation spectra monitored at  $\lambda_{em} = 425$  nm of the sample  $C_{1-x}Eu_xASO$ ,  $x = 1\%$ ) and dashed line (excitation spectra monitored at  $\lambda_{em} = 611$  nm of the same sample  $C_{1-x}Eu_xASO$ ,  $x = 1\%$ ) are also shown for comparison

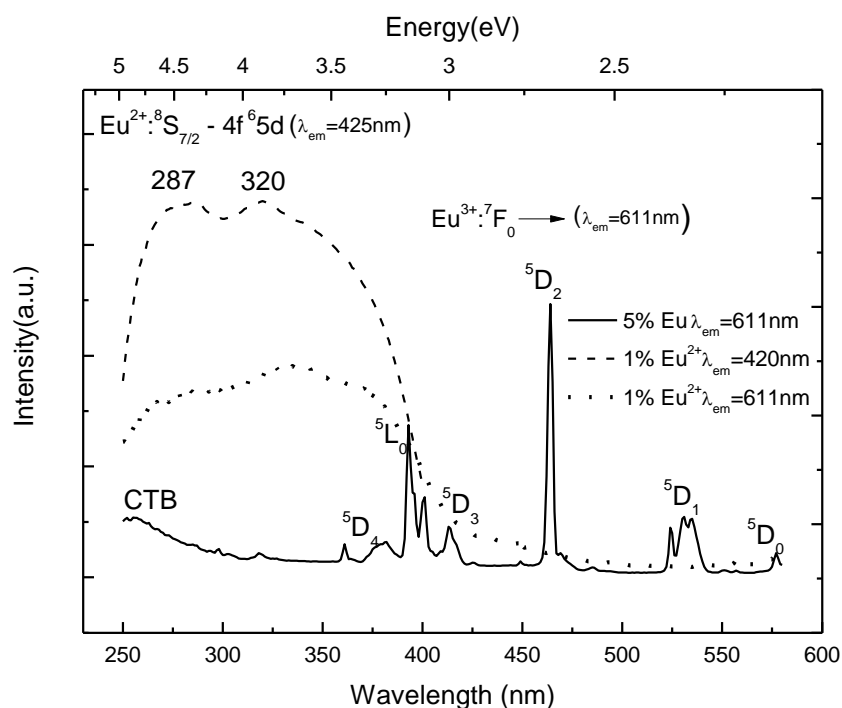

Figure.S7  $4f^65d^1$  emission decay curves acquired at room temperature for  $C_{1-3x/2}Eu_xASO$  and  $C_{1-x}Eu_xASO_{8+0.5x}$  ( $x = 0.5\%$  to  $13\%$ ), monitored the emission at  $420\text{ nm}$  and with excitation at  $400\text{ nm}$  (data collected on  $I = I_0\exp(-t/\tau)$ )

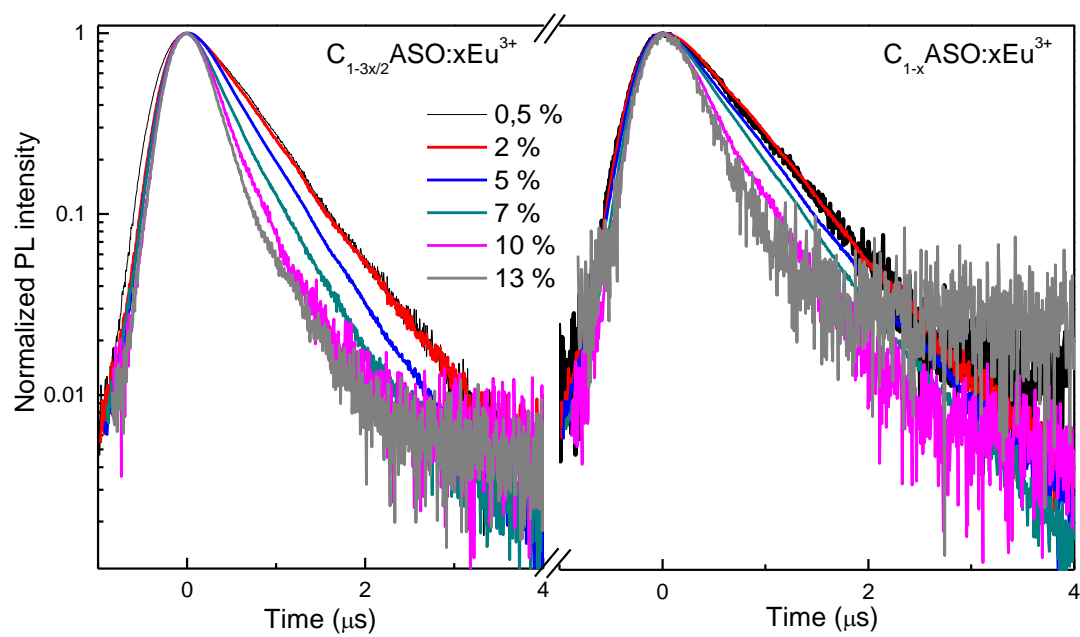

Supplement: c3tc32378a.pdf [file c3tc32378a.pdf]
